# Supplementary material for: Microporous sensor: gas sorption, guest exchange and guest-dependant luminescence of metal–organic framework
Source: Royal Society of Chemistry journal article supplement (doi:10.1039/c0dt00999g), 2010-11-23
Supplement: c0dt00999g.pdf [file c0dt00999g.pdf]

# Electronic Supplementary Information

## Microporous sensor: gas sorption, guest exchange and guest-dependant luminescence of metal-organic framework

Sergey A. Sapchenko, Denis G. Samsonenko\*, Danil N. Dybtsev, Maxim S. Melgunov, and Vladimir P. Fedin

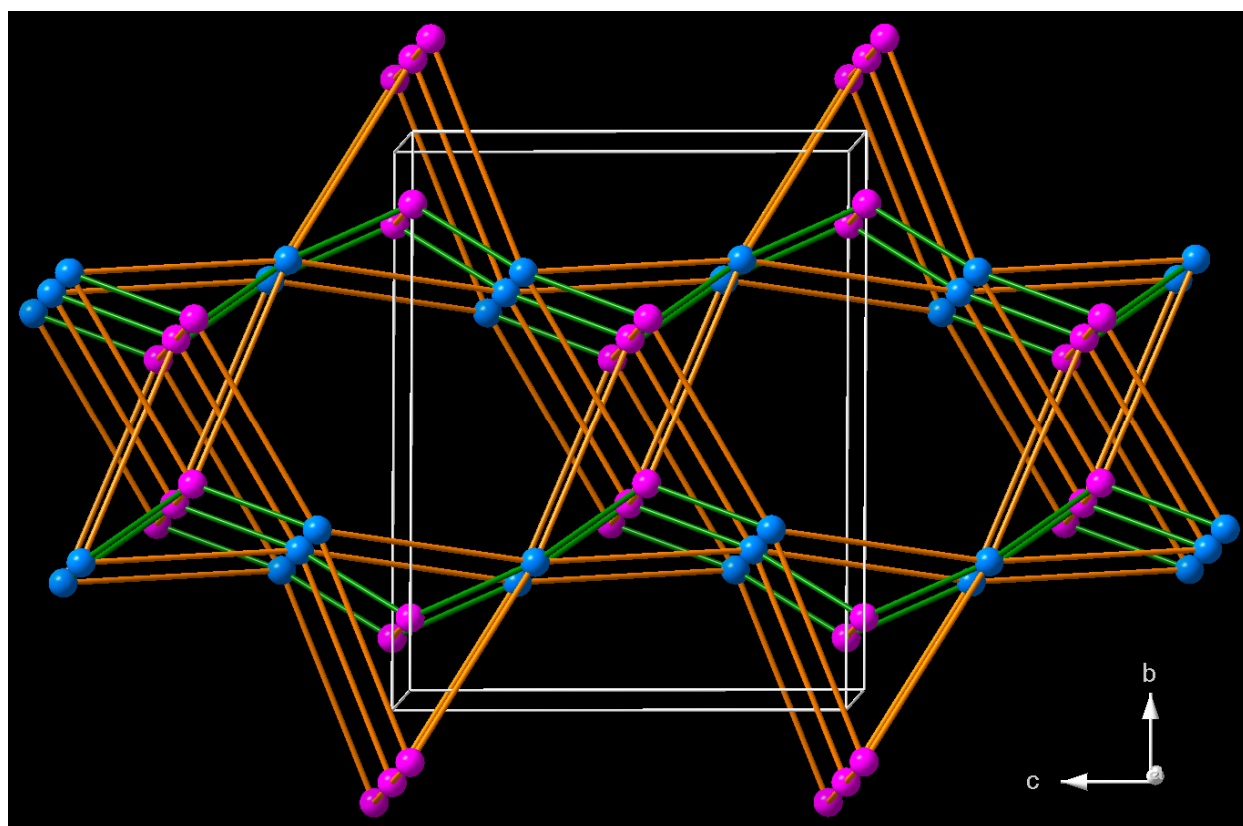

Fig. S1. Simplified topology of the coordination network in **1** (view along *a* axis). Type A building units are blue, type B are purple,  $\text{ndc}^{2-}$  linkers are brown, urotropin linkers are green. The unit cell is white.

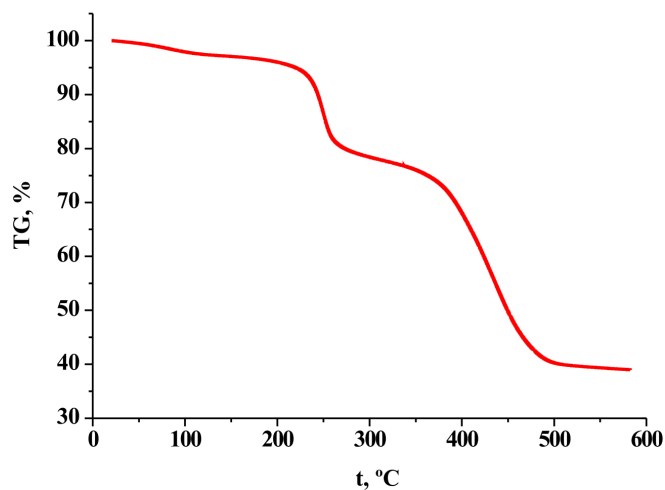

**Fig. S2.** TG curve of compound **1** at a heating rate of 10 K min<sup>-1</sup>.

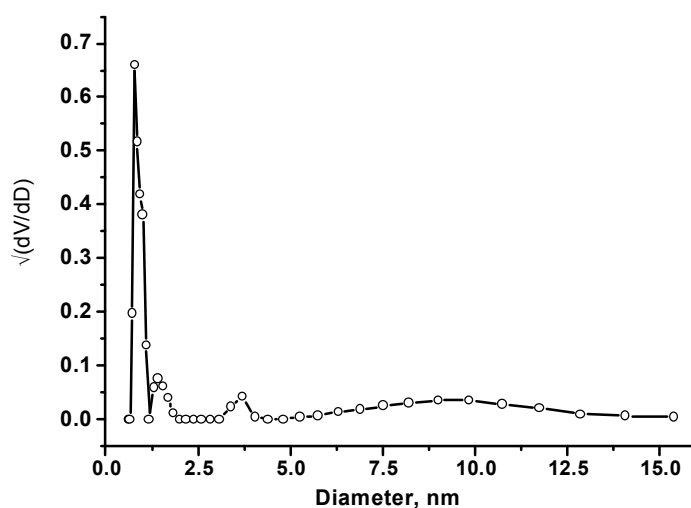

**Fig. S3.** Channels size distribution diagram for **2**.

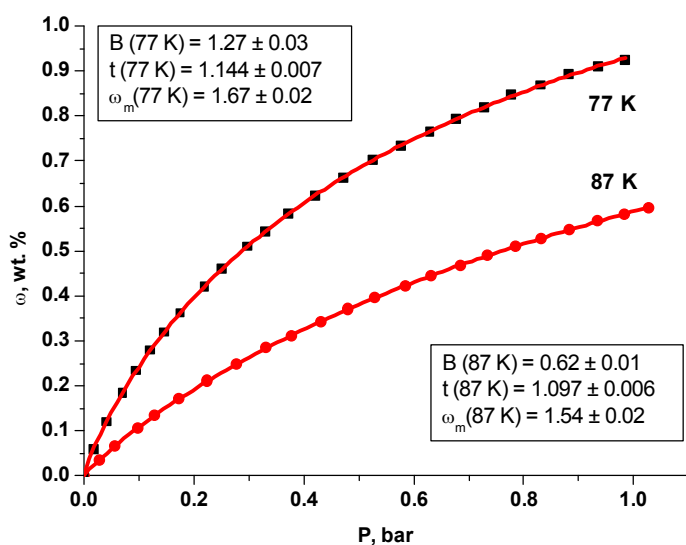

$$\frac{\omega}{\omega_m} = \frac{BP^{1/t}}{1 + BP^{1/t}}$$

$$P = \left( \frac{\frac{\omega}{\omega_m}}{B - B \frac{\omega}{\omega_m}} \right)^t$$

ω – amount adsorbed (wt. %),  
ω<sub>m</sub> – amount adsorbed (wt. %) at saturation,  
P – pressure,  
B and t – constants

**Fig. S4.** Langmuir-Freundlich fit.

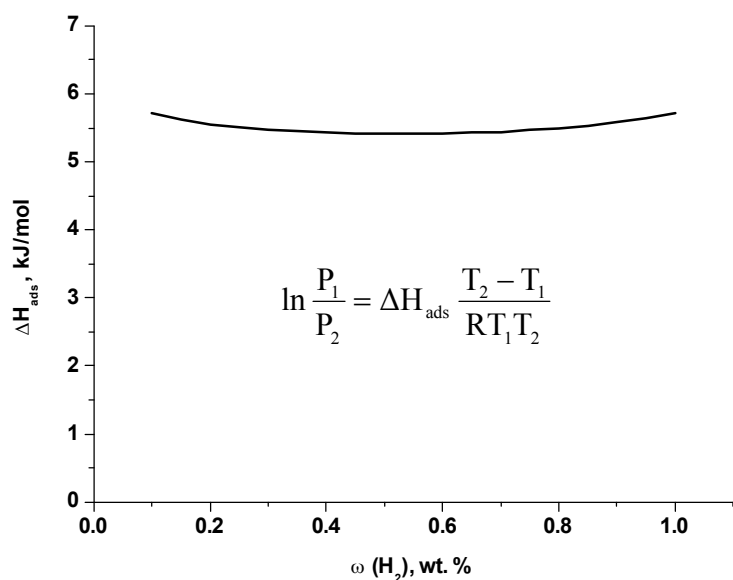

**Fig. S5.** A function of enthalpy of adsorption from amount of hydrogen adsorbed.

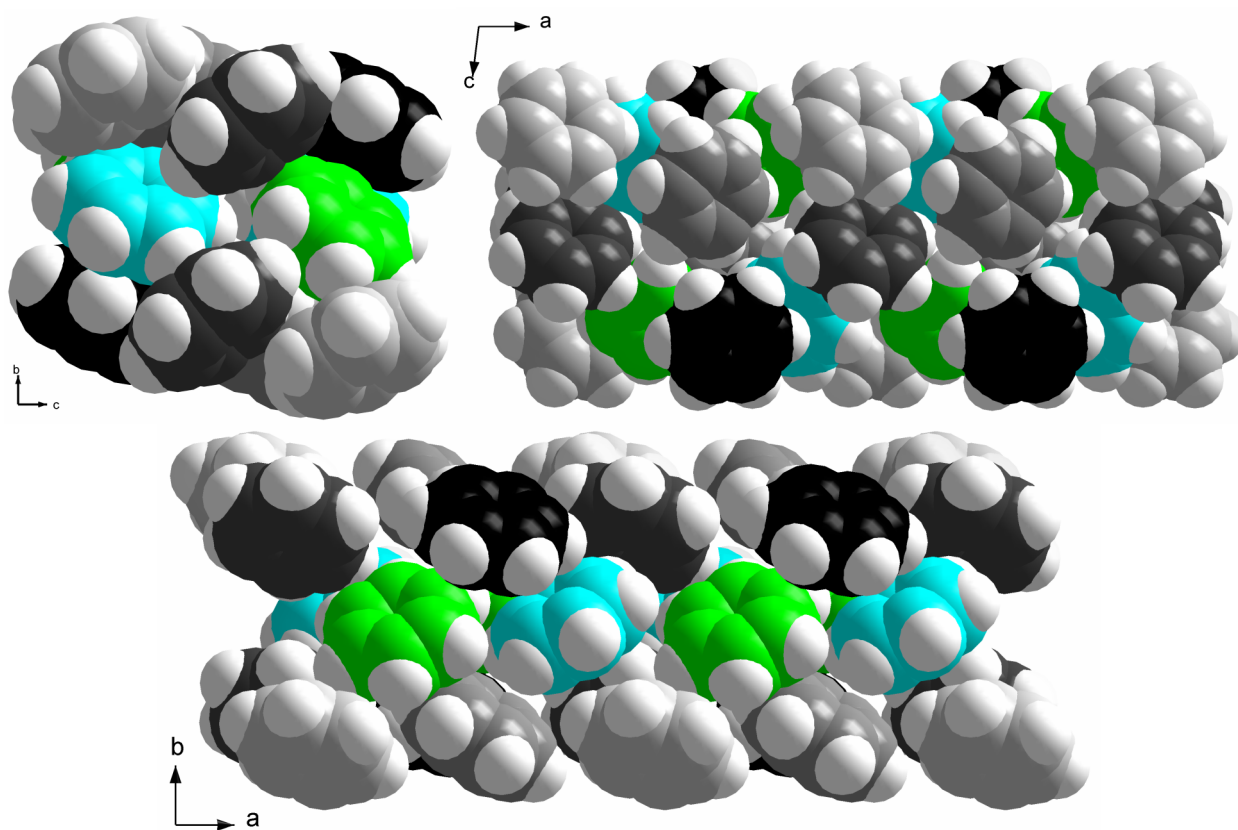

**Fig. S6.** Packing of benzene molecules inside the channels of **3**.

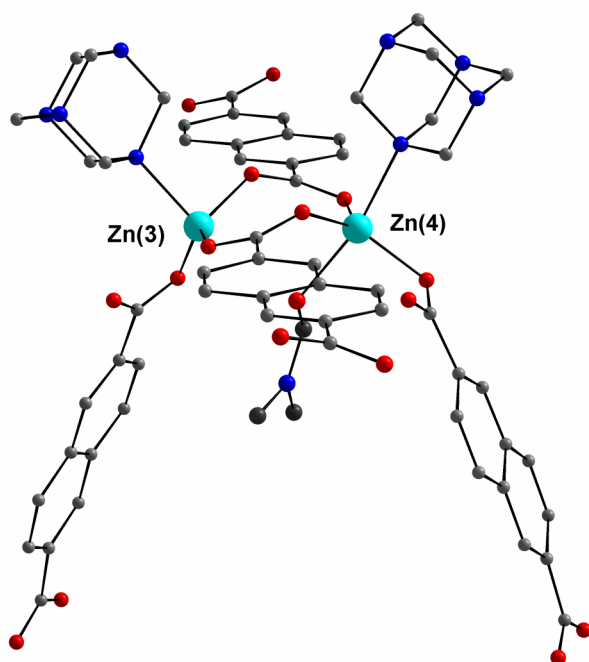

**Fig. S7.** Structure of secondary building unit  $\{Zn_2(dmf)(COO)_4\}^{2-}$  in **4**. Zn atoms are shown cyan, O – red, N – blue, C (ndc) – grey, C (dmf) – dark grey. Hydrogen atoms are omitted for clarity.

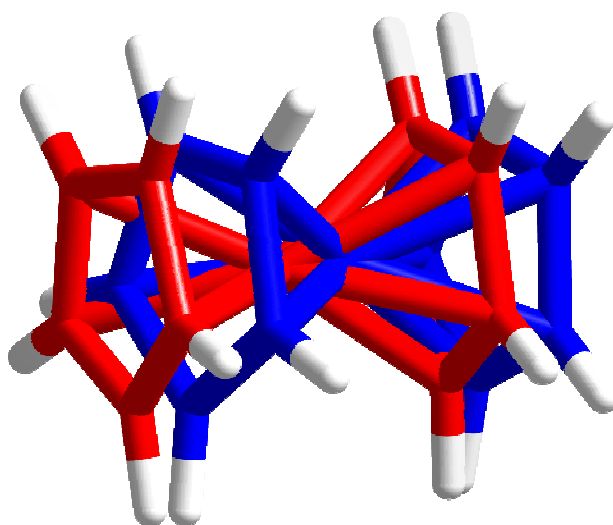

**Fig. S8.** Guest ferrocene molecule disorder over two positions (shown red and blue) in **4**.

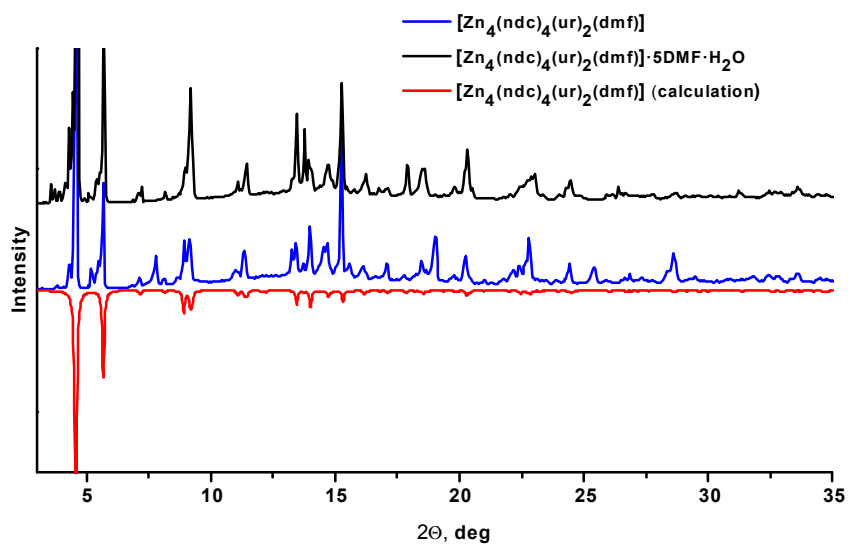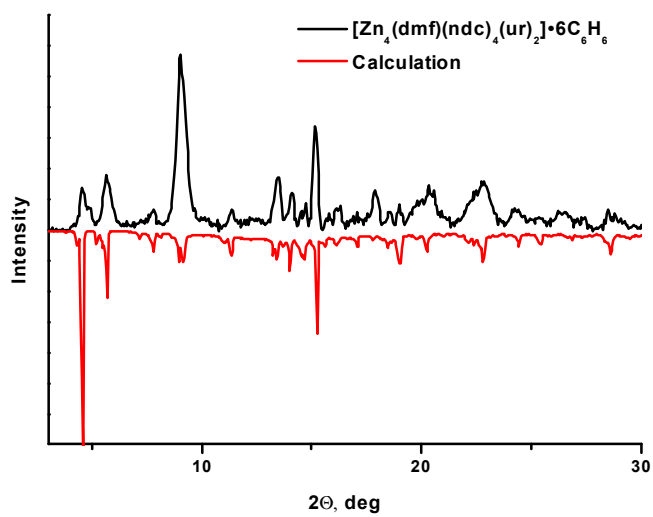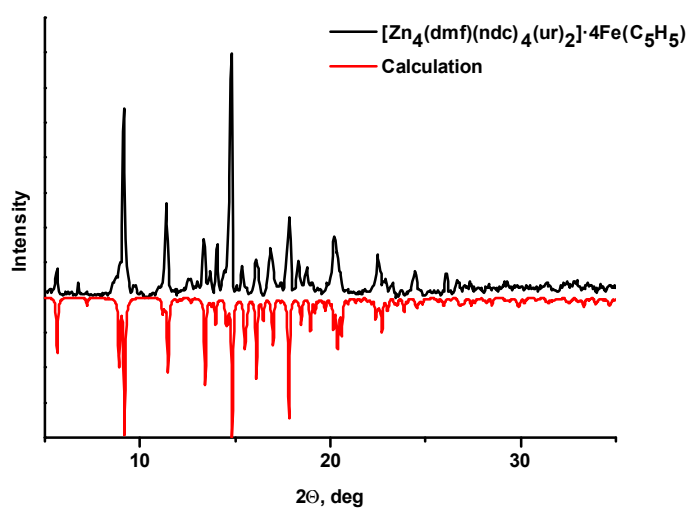

**Fig. S9.** XRD plots for 1–4.

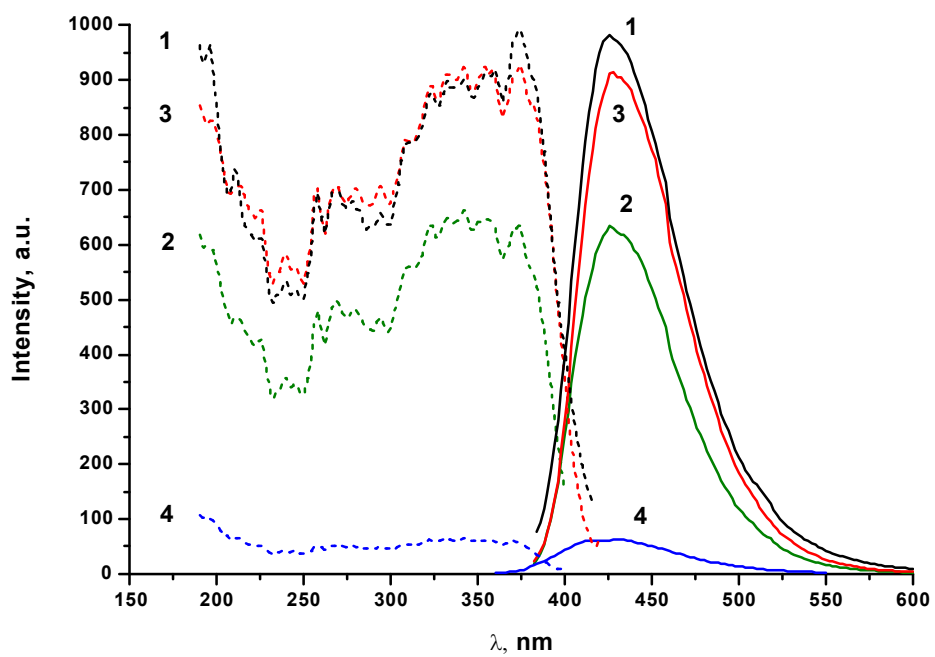

**Fig. S10.** The solid-state fluorescent spectra of **1** (black), **2** (green), **3** (red) and **4** (blue) recorded at room temperature (dashed lines — excitation spectra, solid lines — emission spectra)

**Table S1.** Selected bond lengths and angles for **1**.

| Bond                                         | <i>d</i> , Å | Bond                                         | <i>d</i> , Å |
|----------------------------------------------|--------------|----------------------------------------------|--------------|
| Zn(1)–N(11)                                  | 2.067(6)     | Zn(3)–N(12) <sup>b</sup>                     | 2.111(7)     |
| Zn(1)–O(12)                                  | 2.006(5)     | Zn(3)–O(34) <sup>c</sup>                     | 1.899(9)     |
| Zn(1)–O(13) <sup>a</sup>                     | 2.024(6)     | Zn(3)–O(42)                                  | 1.974(6)     |
| Zn(1)–O(22)                                  | 2.053(6)     | Zn(3)–O(43) <sup>d</sup>                     | 1.962(6)     |
| Zn(1)–O(32)                                  | 2.041(6)     | Zn(4)–N(22)                                  | 2.143(7)     |
| Zn(2)–N(21)                                  | 2.065(6)     | Zn(4)–O(23) <sup>e</sup>                     | 2.161(16)    |
| Zn(2)–O(11)                                  | 2.069(6)     | Zn(4)–O(24) <sup>e</sup>                     | 2.367(13)    |
| Zn(2)–O(14) <sup>a</sup>                     | 2.038(6)     | Zn(4)–O(41)                                  | 1.982(7)     |
| Zn(2)–O(21)                                  | 2.013(6)     | Zn(4)–O(44) <sup>d</sup>                     | 1.997(6)     |
| Zn(2)–O(31)                                  | 2.021(6)     | Zn(4)–O(1D)                                  | 2.297(11)    |
| Angle                                        | ω, deg.      | Angle                                        | ω, deg.      |
| O(12)–Zn(1)–N(11)                            | 103.9(2)     | O(34) <sup>c</sup> –Zn(3)–O(42)              | 97.4(4)      |
| O(12)–Zn(1)–O(13) <sup>a</sup>               | 159.1(2)     | O(34) <sup>c</sup> –Zn(3)–O(43) <sup>d</sup> | 120.7(4)     |
| O(12)–Zn(1)–O(22)                            | 88.7(3)      | O(42)–Zn(3)–N(12) <sup>b</sup>               | 92.1(3)      |
| O(12)–Zn(1)–O(32)                            | 87.6(3)      | O(43) <sup>d</sup> –Zn(3)–N(12) <sup>b</sup> | 96.7(3)      |
| O(13) <sup>a</sup> –Zn(1)–N(11)              | 97.0(2)      | O(43) <sup>d</sup> –Zn(3)–O(42)              | 130.5(3)     |
| O(13) <sup>a</sup> –Zn(1)–O(22)              | 86.9(3)      | N(22)–Zn(4)–O(23) <sup>e</sup>               | 102.0(5)     |
| O(13) <sup>a</sup> –Zn(1)–O(32)              | 89.5(3)      | N(22)–Zn(4)–O(24) <sup>e</sup>               | 92.3(4)      |
| O(22)–Zn(1)–N(11)                            | 99.4(2)      | N(22)–Zn(4)–O(1D)                            | 172.0(4)     |
| O(32)–Zn(1)–N(11)                            | 100.6(3)     | O(23) <sup>e</sup> –Zn(4)–O(24) <sup>e</sup> | 57.6(4)      |
| O(32)–Zn(1)–O(22)                            | 160.0(3)     | O(23) <sup>e</sup> –Zn(4)–O(1D)              | 83.9(5)      |
| N(21)–Zn(2)–O(11)                            | 95.4(2)      | O(41)–Zn(4)–N(22)                            | 94.9(3)      |
| O(14) <sup>a</sup> –Zn(2)–N(21)              | 104.3(3)     | O(41)–Zn(4)–O(23) <sup>e</sup>               | 139.9(4)     |
| O(14) <sup>a</sup> –Zn(2)–O(11)              | 160.2(2)     | O(41)–Zn(4)–O(24) <sup>e</sup>               | 85.9(4)      |
| O(21)–Zn(2)–N(21)                            | 98.6(3)      | O(41)–Zn(4)–O(44) <sup>d</sup>               | 124.8(3)     |
| O(21)–Zn(2)–O(11)                            | 87.9(3)      | O(41)–Zn(4)–O(1D)                            | 83.8(4)      |
| O(21)–Zn(2)–O(14) <sup>a</sup>               | 87.5(3)      | O(44) <sup>d</sup> –Zn(4)–N(22)              | 90.4(3)      |
| O(21)–Zn(2)–O(31)                            | 159.1(3)     | O(44) <sup>d</sup> –Zn(4)–O(23) <sup>e</sup> | 91.5(4)      |
| O(31)–Zn(2)–N(21)                            | 102.1(3)     | O(44) <sup>d</sup> –Zn(4)–O(24) <sup>e</sup> | 148.8(4)     |
| O(31)–Zn(2)–O(11)                            | 86.8(3)      | O(44) <sup>d</sup> –Zn(4)–O(1D)              | 84.0(3)      |
| O(31)–Zn(2)–O(14) <sup>a</sup>               | 90.7(3)      | O(1D)–Zn(4)–O(24) <sup>e</sup>               | 95.5(4)      |
| O(34) <sup>c</sup> –Zn(3)–N(12) <sup>b</sup> | 116.9(4)     |                                              |              |

Symmetry transformations used to generate equivalent atoms: <sup>a</sup>  $x-1/2, -y+1/2, z-1/2$ ;

<sup>b</sup>  $x-1/2, -y+1/2, z+1/2$ ; <sup>c</sup>  $-x+1, -y+1, -z+1$ ; <sup>d</sup>  $x-1, y, z$ ; <sup>e</sup>  $-x+1/2, y+1/2, -z+1/2$ .

**Table S2.** Selected bond lengths and angles for **2**.

| Bond                            | <i>d</i> , Å | Bond                                         | <i>d</i> , Å |
|---------------------------------|--------------|----------------------------------------------|--------------|
| Zn(1)–N(11)                     | 2.073(3)     | Zn(3)–N(12)                                  | 2.150(3)     |
| Zn(1)–O(11)                     | 2.033(3)     | Zn(3)–O(24) <sup>b</sup>                     | 1.934(3)     |
| Zn(1)–O(14) <sup>a</sup>        | 2.055(2)     | Zn(3)–O(42)                                  | 1.982(2)     |
| Zn(1)–O(21)                     | 2.020(2)     | Zn(3)–O(43) <sup>b</sup>                     | 1.949(2)     |
| Zn(1)–O(31)                     | 2.031(2)     | Zn(4)–O(1)                                   | 2.282(4)     |
| Zn(2)–N(21)                     | 2.067(3)     | Zn(4)–N(22) <sup>d</sup>                     | 2.184(3)     |
| Zn(2)–O(12)                     | 2.039(3)     | Zn(4)–O(41)                                  | 1.993(2)     |
| Zn(2)–O(13) <sup>a</sup>        | 2.040(3)     | Zn(4)–O(44) <sup>c</sup>                     | 2.002(2)     |
| Zn(2)–O(22)                     | 2.011(2)     | Zn(4)–O(33) <sup>e</sup>                     | 2.259(4)     |
| Zn(2)–O(32)                     | 2.029(2)     | Zn(4)–O(34) <sup>e</sup>                     | 2.118(3)     |
| Angle                           | ω, deg.      | Angle                                        | ω, deg.      |
| O(11)–Zn(1)–N(11)               | 102.20(11)   | O(24) <sup>b</sup> –Zn(3)–O(42)              | 97.40(13)    |
| O(11)–Zn(1)–O(14) <sup>a</sup>  | 162.21(11)   | O(24) <sup>b</sup> –Zn(3)–O(43) <sup>c</sup> | 127.92(13)   |
| O(14) <sup>a</sup> –Zn(1)–N(11) | 95.58(11)    | O(42)–Zn(3)–N(12)                            | 90.36(10)    |
| O(21)–Zn(1)–N(11)               | 100.01(10)   | O(43) <sup>c</sup> –Zn(3)–N(12)              | 94.05(10)    |
| O(21)–Zn(1)–O(11)               | 89.33(12)    | O(43) <sup>c</sup> –Zn(3)–O(42)              | 128.12(11)   |
| O(21)–Zn(1)–O(14) <sup>a</sup>  | 87.56(11)    | N(22) <sup>d</sup> –Zn(4)–O(1)               | 170.44(13)   |
| O(21)–Zn(1)–O(31)               | 161.76(10)   | N(22) <sup>d</sup> –Zn(4)–O(33) <sup>e</sup> | 101.12(12)   |
| O(31)–Zn(1)–N(11)               | 98.23(10)    | O(41)–Zn(4)–O(1)                             | 84.27(13)    |
| O(31)–Zn(1)–O(11)               | 86.84(12)    | O(41)–Zn(4)–N(22) <sup>d</sup>               | 91.87(10)    |
| O(12)–Zn(2)–N(21)               | 96.93(11)    | O(41)–Zn(4)–O(44) <sup>c</sup>               | 120.47(11)   |
| O(12)–Zn(2)–O(13) <sup>a</sup>  | 161.61(11)   | O(41)–Zn(4)–O(33) <sup>e</sup>               | 149.70(12)   |
| O(13) <sup>a</sup> –Zn(2)–N(21) | 101.45(10)   | O(41)–Zn(4)–O(34) <sup>e</sup>               | 92.04(12)    |
| O(22)–Zn(2)–N(21)               | 100.19(11)   | O(44) <sup>c</sup> –Zn(4)–O(1)               | 86.15(11)    |
| O(22)–Zn(2)–O(12)               | 88.95(12)    | O(44) <sup>c</sup> –Zn(4)–N(22) <sup>d</sup> | 88.29(10)    |
| O(22)–Zn(2)–O(13) <sup>a</sup>  | 87.51(13)    | O(44) <sup>c</sup> –Zn(4)–O(33) <sup>e</sup> | 87.48(11)    |
| O(22)–Zn(2)–O(32)               | 161.55(11)   | O(44) <sup>c</sup> –Zn(4)–O(34) <sup>e</sup> | 146.73(12)   |
| O(32)–Zn(2)–N(21)               | 98.23(10)    | O(33) <sup>e</sup> –Zn(4)–O(1)               | 86.41(15)    |
| O(32)–Zn(2)–O(12)               | 87.60(11)    | O(34) <sup>e</sup> –Zn(4)–O(1)               | 90.66(13)    |
| O(32)–Zn(2)–O(13) <sup>a</sup>  | 90.07(12)    | O(34) <sup>e</sup> –Zn(4)–N(22) <sup>d</sup> | 98.23(12)    |
| O(24) <sup>b</sup> –Zn(3)–N(12) | 111.49(12)   | O(34) <sup>e</sup> –Zn(4)–O(33) <sup>e</sup> | 59.26(12)    |

Symmetry transformations used to generate equivalent atoms: <sup>a</sup>  $x - \frac{1}{2}, -y + \frac{1}{2}, z - \frac{1}{2}$ ;

<sup>b</sup>  $x, -y + 1, z + \frac{1}{2}$ ; <sup>c</sup>  $x, y, z - 1$ ; <sup>d</sup>  $x - \frac{1}{2}, -y + \frac{1}{2}, z + \frac{1}{2}$ ; <sup>e</sup>  $x - \frac{1}{2}, y + \frac{1}{2}, z$ .



**Table S3.** Selected bond lengths and angles for **3**.

| Bond                                         | <i>d</i> , Å | Bond                                         | <i>d</i> , Å |
|----------------------------------------------|--------------|----------------------------------------------|--------------|
| Zn(1)–N(11)                                  | 2.0775(14)   | Zn(3)–N(12) <sup>b</sup>                     | 2.1376(14)   |
| Zn(1)–O(12)                                  | 2.0199(12)   | Zn(3)–O(34) <sup>c</sup>                     | 1.9441(14)   |
| Zn(1)–O(13) <sup>a</sup>                     | 2.0328(12)   | Zn(3)–O(42)                                  | 1.9713(12)   |
| Zn(1)–O(22)                                  | 2.0635(12)   | Zn(3)–O(43) <sup>d</sup>                     | 1.9432(12)   |
| Zn(1)–O(32)                                  | 2.0587(12)   | Zn(4)–O(1D)                                  | 2.2334(16)   |
| Zn(2)–N(21)                                  | 2.0634(14)   | Zn(4)–N(22)                                  | 2.1702(14)   |
| Zn(2)–O(11)                                  | 2.0768(12)   | Zn(4)–O(23) <sup>e</sup>                     | 2.2102(17)   |
| Zn(2)–O(14) <sup>a</sup>                     | 2.0384(13)   | Zn(4)–O(24) <sup>e</sup>                     | 2.1407(15)   |
| Zn(2)–O(21)                                  | 2.0286(13)   | Zn(4)–O(41)                                  | 2.0018(12)   |
| Zn(2)–O(31)                                  | 2.0063(12)   | Zn(4)–O(44) <sup>d</sup>                     | 2.0163(12)   |
| Angle                                        | ω, deg.      | Angle                                        | ω, deg.      |
| O(12)–Zn(1)–N(11)                            | 101.45(5)    | O(34) <sup>c</sup> –Zn(3)–O(42)              | 99.24(6)     |
| O(12)–Zn(1)–O(13) <sup>a</sup>               | 160.02(5)    | O(42)–Zn(3)–N(12) <sup>b</sup>               | 91.33(5)     |
| O(12)–Zn(1)–O(22)                            | 88.94(5)     | O(43) <sup>d</sup> –Zn(3)–N(12) <sup>b</sup> | 96.47(5)     |
| O(12)–Zn(1)–O(32)                            | 86.85(5)     | O(43) <sup>d</sup> –Zn(3)–O(34) <sup>c</sup> | 124.35(6)    |
| O(13) <sup>a</sup> –Zn(1)–N(11)              | 98.51(5)     | O(43) <sup>d</sup> –Zn(3)–O(42)              | 126.64(5)    |
| O(13) <sup>a</sup> –Zn(1)–O(22)              | 87.75(5)     | N(22)–Zn(4)–O(1D)                            | 169.05(6)    |
| O(13) <sup>a</sup> –Zn(1)–O(32)              | 90.30(5)     | N(22)–Zn(4)–O(23) <sup>e</sup>               | 100.15(6)    |
| O(22)–Zn(1)–N(11)                            | 97.48(5)     | O(23) <sup>e</sup> –Zn(4)–O(1D)              | 87.83(7)     |
| O(32)–Zn(1)–N(11)                            | 100.36(5)    | O(24) <sup>e</sup> –Zn(4)–O(1D)              | 89.12(6)     |
| O(32)–Zn(1)–O(22)                            | 162.14(5)    | O(24) <sup>e</sup> –Zn(4)–N(22)              | 101.33(6)    |
| N(21)–Zn(2)–O(11)                            | 94.57(5)     | O(24) <sup>e</sup> –Zn(4)–O(23) <sup>e</sup> | 60.31(6)     |
| O(14) <sup>a</sup> –Zn(2)–N(21)              | 103.84(5)    | O(41)–Zn(4)–O(1D)                            | 85.52(6)     |
| O(14) <sup>a</sup> –Zn(2)–O(11)              | 161.51(5)    | O(41)–Zn(4)–N(22)                            | 91.24(5)     |
| O(21)–Zn(2)–N(21)                            | 99.29(5)     | O(41)–Zn(4)–O(23) <sup>e</sup>               | 149.13(6)    |
| O(21)–Zn(2)–O(11)                            | 88.18(6)     | O(41)–Zn(4)–O(24) <sup>e</sup>               | 89.44(6)     |
| O(21)–Zn(2)–O(14) <sup>a</sup>               | 87.25(6)     | O(41)–Zn(4)–O(44) <sup>d</sup>               | 118.03(5)    |
| O(31)–Zn(2)–N(21)                            | 101.28(5)    | O(44) <sup>d</sup> –Zn(4)–O(1D)              | 83.54(5)     |
| O(31)–Zn(2)–O(11)                            | 87.50(5)     | O(44) <sup>d</sup> –Zn(4)–N(22)              | 88.79(5)     |
| O(31)–Zn(2)–O(14) <sup>a</sup>               | 90.47(6)     | O(44) <sup>d</sup> –Zn(4)–O(23) <sup>e</sup> | 91.02(5)     |
| O(31)–Zn(2)–O(21)                            | 159.25(5)    | O(44) <sup>d</sup> –Zn(4)–O(24) <sup>e</sup> | 150.72(6)    |
| O(34) <sup>c</sup> –Zn(3)–N(12) <sup>b</sup> | 113.89(6)    |                                              |              |

Symmetry transformations used to generate equivalent atoms: <sup>a</sup>  $x + 1/2, -y + 3/2, z + 1/2$ ;

<sup>b</sup>  $x + 1/2, -y + 3/2, z - 1/2$ ; <sup>c</sup>  $-x + 1, -y + 1, -z + 1$ ; <sup>d</sup>  $x + 1, y, z$ ; <sup>e</sup>  $-x + 3/2, y - 1/2, -z + 3/2$ .

**Table S4.** Selected bond lengths and angles for **4**.

| Bond                              | <i>d</i> , Å    | Bond                                           | <i>d</i> , Å    |
|-----------------------------------|-----------------|------------------------------------------------|-----------------|
| Zn(1)–N(21)                       | 2.065(3)        | Zn(3)–N(14) <sup>d</sup>                       | 2.129(3)        |
| Zn(1)–O(101)                      | 2.022(3)        | Zn(3)–O(402)                                   | 1.945(3)        |
| Zn(1)–O(201)                      | 2.018(3)        | Zn(3)–O(103) <sup>e</sup>                      | 1.956(3)        |
| Zn(1)–O(301)                      | 2.033(3)        | Zn(3)–O(404) <sup>c</sup>                      | 1.981(3)        |
| Zn(1)–O(304) <sup>a</sup>         | 2.051(3)        | Zn(4)–O(1D)                                    | 2.205(3)        |
| Zn(2)–N(11)                       | 2.068(3)        | Zn(4)–N(22)                                    | 2.195(3)        |
| Zn(2)–O(102)                      | 2.038(3)        | Zn(4)–O(204) <sup>b</sup>                      | 2.027(3)        |
| Zn(2)–O(202)                      | 2.045(3)        | Zn(4)–O(401)                                   | 1.988(3)        |
| Zn(2)–O(302)                      | 2.049(3)        | Zn(4)–O(403) <sup>c</sup>                      | 1.996(3)        |
| Zn(2)–O(303) <sup>a</sup>         | 2.019(3)        |                                                |                 |
| Angle                             | $\omega$ , deg. | Angle                                          | $\omega$ , deg. |
| O(101)–Zn(1)–N(21)                | 99.15(12)       | O(303) <sup>a</sup> –Zn(2)–O(202)              | 86.96(12)       |
| O(101)–Zn(1)–O(301)               | 88.00(12)       | O(303) <sup>a</sup> –Zn(2)–O(302)              | 160.83(12)      |
| O(101)–Zn(1)–O(304) <sup>a</sup>  | 89.72(11)       | O(103) <sup>e</sup> –Zn(3)–N(14) <sup>d</sup>  | 111.68(12)      |
| O(201)–Zn(1)–N(21)                | 101.77(12)      | O(103) <sup>e</sup> –Zn(3)–O(404) <sup>c</sup> | 97.84(12)       |
| O(201)–Zn(1)–O(101)               | 159.06(12)      | O(402)–Zn(3)–N(14) <sup>d</sup>                | 97.45(12)       |
| O(201)–Zn(1)–O(301)               | 88.22(12)       | O(402)–Zn(3)–O(103) <sup>e</sup>               | 127.80(12)      |
| O(201)–Zn(1)–O(304) <sup>a</sup>  | 87.59(12)       | O(402)–Zn(3)–O(404) <sup>c</sup>               | 124.61(11)      |
| O(301)–Zn(1)–N(21)                | 103.07(12)      | O(204) <sup>b</sup> –Zn(4)–O(1D)               | 89.64(12)       |
| O(301)–Zn(1)–O(304) <sup>a</sup>  | 162.08(12)      | O(204) <sup>b</sup> –Zn(4)–N(22)               | 102.73(13)      |
| O(304) <sup>a</sup> –Zn(1)–N(21)  | 94.84(12)       | O(404) <sup>c</sup> –Zn(3)–N(14) <sup>d</sup>  | 91.39(11)       |
| O(102)–Zn(2)–N(11)                | 96.27(12)       | N(22)–Zn(4)–O(1D)                              | 167.58(11)      |
| O(102)–Zn(2)–O(202)               | 163.37(12)      | O(401)–Zn(4)–N(22)                             | 86.01(11)       |
| O(102)–Zn(2)–O(302)               | 87.70(11)       | O(401)–Zn(4)–O(204) <sup>b</sup>               | 140.70(14)      |
| O(202)–Zn(2)–N(11)                | 100.35(12)      | O(401)–Zn(4)–O(403) <sup>c</sup>               | 123.74(11)      |
| O(202)–Zn(2)–O(302)               | 89.51(12)       | O(403) <sup>c</sup> –Zn(4)–O(1D)               | 87.31(11)       |
| O(302)–Zn(2)–N(11)                | 98.33(12)       | O(403) <sup>c</sup> –Zn(4)–N(22)               | 90.49(11)       |
| O(303) <sup>a</sup> –Zn(2)–N(11)  | 100.83(12)      | O(403) <sup>c</sup> –Zn(4)–O(204) <sup>b</sup> | 94.75(14)       |
| O(303) <sup>a</sup> –Zn(2)–O(102) | 90.32(12)       | O(401)–Zn(4)–O(1D)                             | 85.06(10)       |

Symmetry transformations used to generate equivalent atoms: <sup>a</sup>  $x + \frac{1}{2}, -y + \frac{3}{2}, z + \frac{1}{2}$ ;

<sup>b</sup>  $x, -y + 1, z - \frac{1}{2}$ ; <sup>c</sup>  $x, y, z + 1$ ; <sup>d</sup>  $x + \frac{1}{2}, -y + \frac{3}{2}, z - \frac{1}{2}$ ; <sup>e</sup>  $x + \frac{1}{2}, y - \frac{1}{2}, z$
